# Supplementary material for: The coordination of amidoxime ligands with uranyl in the gas phase: a mass spectrometry and DFT study
Source: Royal Society of Chemistry journal article supplement (doi:10.1039/c6dt02543a), 2016-01-01
Supplement: c6dt02543a1.pdf [file c6dt02543a1.pdf]

*Supplementary information*

**The Coordination of Amidoxime Ligands with Uranyl in the  
Gas Phase: A Mass Spectrometry and DFT Study**

Zhen Qin,<sup>a</sup> Siwei Shi,<sup>a</sup> Chuting Yang,<sup>b</sup> Jun Wen,<sup>b</sup> Jianping Jia,<sup>a</sup> Xiaofang Zhang,<sup>c</sup> Haizhu Yu\*<sup>c</sup> and Xiaolin Wang\*<sup>a, b</sup>

<sup>a</sup> *Institute of Materials, China Academy of Engineering Physics, Mianyang, 621900, China.*

<sup>b</sup> *Institute of Nuclear Physics and Chemistry, China Academy of Engineering Physics, Mianyang, 621900, China.*

<sup>c</sup> *Department of Chemistry and Center for Atomic Engineering of Advanced Materials, Anhui University, Hefei, 230601, China.*

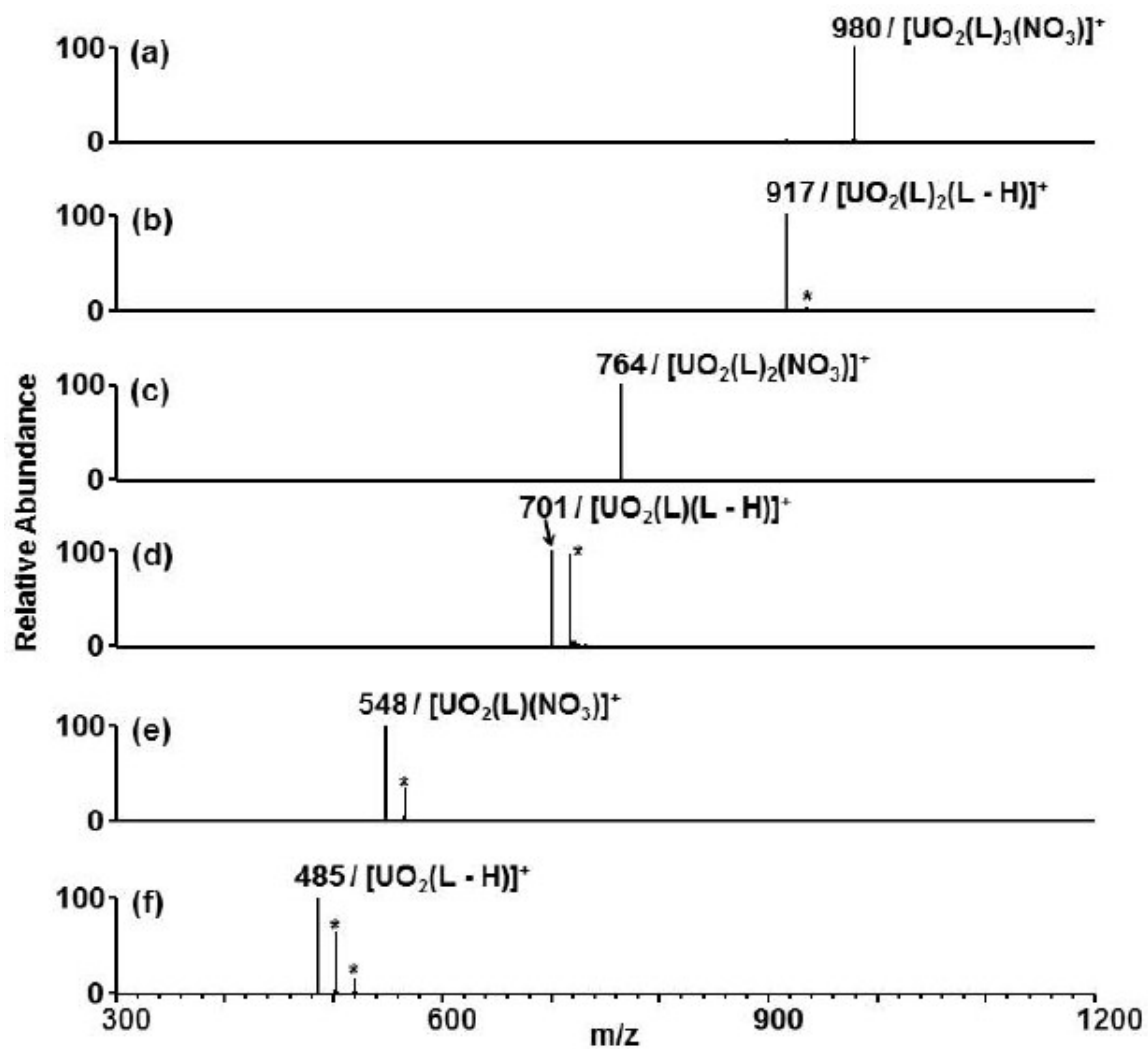

Figure S1. The hydration results of the uranyl-NAO complexes: (a)  $[\text{UO}_2(\text{L})_3(\text{NO}_3)]^+$ , (b)  $[\text{UO}_2(\text{L})_2(\text{L} - \text{H})]^+$ , (c)  $[\text{UO}_2(\text{L})_2(\text{NO}_3)]^+$ , (d)  $[\text{UO}_2(\text{L})(\text{L} - \text{H})]^+$ , (e)  $[\text{UO}_2(\text{L})(\text{NO}_3)]^+$ , and (f)  $[\text{UO}_2(\text{NO}_3)]^+$ . The isolation width was 2 *Dalton*, and the reaction time was 30 *s* for all the ions.

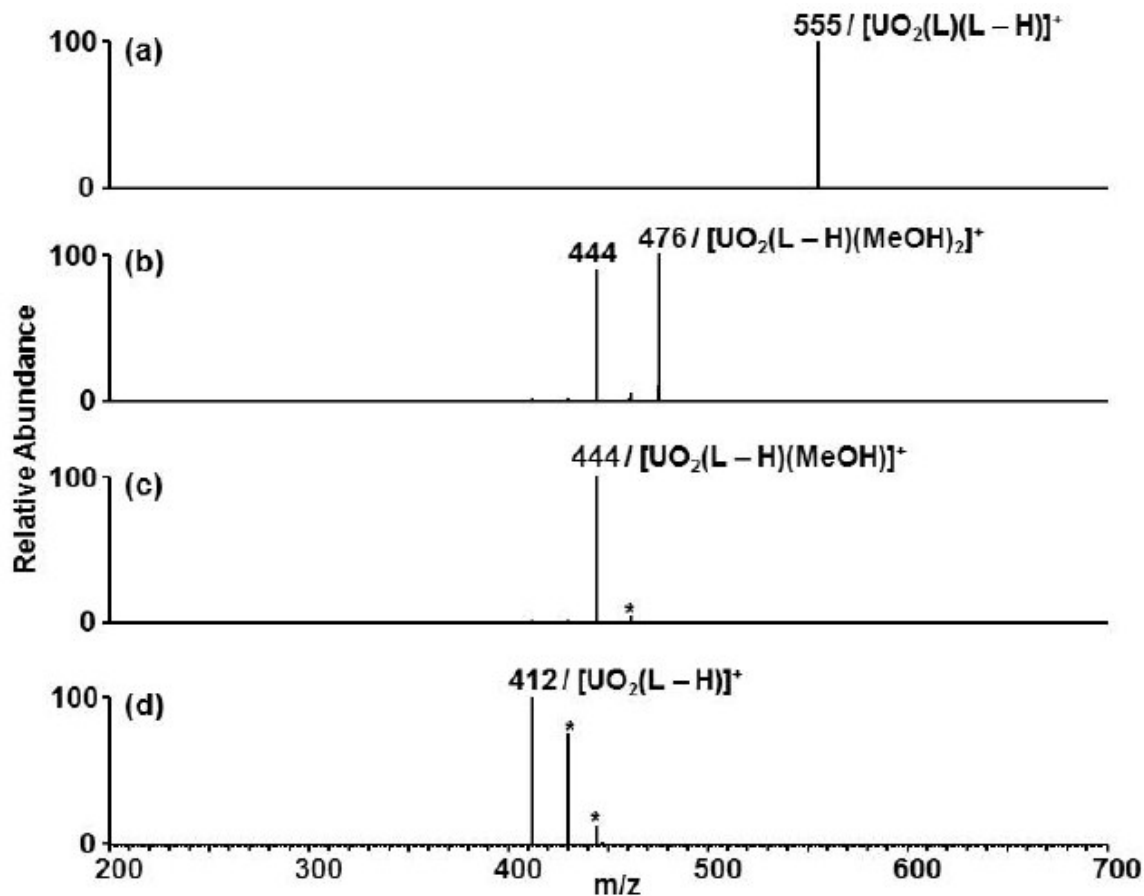

Figure S2. The hydration results of the uranyl-GIO complexes: (a)  $[UO_2(L)(L-H)]^+$ , (b)  $[UO_2(L-H)(MeOH)_2]^+$ , (c)  $[UO_2(L-H)(MeOH)]^+$ , and (d)  $[UO_2(L-H)]^+$ . The isolation width was 2 Dalton, and the reaction time was 30 s for all the ions.

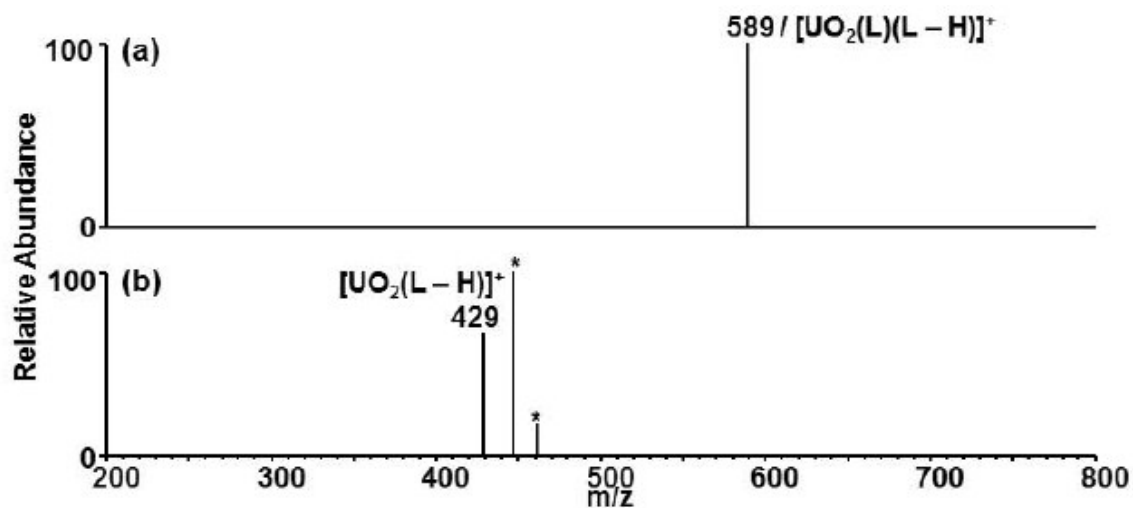

Figure S3. The hydration results of the uranyl-GDO complexes: (a)  $[\text{UO}_2(\text{L})(\text{L}-\text{H})]^+$ , and (b)  $[\text{UO}_2(\text{L}-\text{H})]^+$ . The isolation width was 2 *Dalton*, and the reaction time was 30 s for all the ions.

### Cartesian Coordinates of all species

Figure 4 (a):  $[\text{UO}_2(\text{NAO} - \text{H})]^+$

|   |             |             |             |
|---|-------------|-------------|-------------|
| U | -2.77696500 | -0.60166500 | 0.19449500  |
| O | -2.96197700 | 0.22060000  | 1.73561700  |
| O | -2.71569300 | -1.73889600 | -1.14126800 |
| O | -2.59579000 | 1.19151600  | -0.97560600 |
| N | -1.28087300 | 0.86099300  | -0.64358800 |
| C | -0.41102000 | 1.86537100  | -0.59094300 |
| N | -0.81125400 | 3.11412800  | -0.83192600 |
| H | -1.78451700 | 3.28853900  | -1.03908300 |
| H | -0.13882800 | 3.85093200  | -0.97130100 |
| C | 4.80765200  | -1.43020900 | -0.55709000 |
| C | 3.49188700  | -1.15595600 | -0.83062900 |
| C | 2.88621300  | 0.05225100  | -0.39901900 |
| C | 3.68739300  | 0.99904000  | 0.32561200  |
| C | 5.02972700  | 0.70023200  | 0.59927500  |
| C | 5.59423300  | -0.49418300 | 0.16921500  |
| H | 0.95157800  | -0.34392800 | -1.25859800 |
| H | 5.24238500  | -2.35878100 | -0.89998200 |
| H | 2.90014600  | -1.87225300 | -1.39012400 |
| C | 1.53940100  | 0.35474400  | -0.67404200 |
| C | 3.08242000  | 2.22312600  | 0.73728800  |
| H | 5.65239000  | 1.39884400  | 1.14455500  |
| C | 1.77677300  | 2.50329400  | 0.44520300  |
| C | 0.97883800  | 1.55879900  | -0.26699200 |
| H | 3.67593000  | 2.93566900  | 1.29835800  |
| H | 1.33525200  | 3.42840300  | 0.79731900  |
| O | 6.88825800  | -0.68446300 | 0.47840100  |
| C | 7.55807200  | -1.87745100 | 0.05700500  |
| H | 7.56922400  | -1.95913200 | -1.03344600 |
| H | 8.57709800  | -1.77951300 | 0.42295600  |
| H | 7.09710300  | -2.76583100 | 0.49791200  |

Figure 4 (b):  $[\text{UO}_2(\text{NAO})(\text{NO}_3)]^+$

|   |            |             |             |
|---|------------|-------------|-------------|
| U | 2.72332300 | 0.12910100  | -0.06798800 |
| O | 2.20706300 | -1.94055700 | -0.85431100 |
| N | 0.90461300 | -1.47723500 | -0.81753900 |
| C | 0.01778000 | -2.19962200 | -0.01148100 |
| N | 0.56004200 | -3.17953100 | 0.67637600  |
| H | 1.53913400 | -3.39138900 | 0.51190700  |

|   |             |             |             |
|---|-------------|-------------|-------------|
| H | 0.04701300  | -3.66396900 | 1.39687900  |
| C | -4.91478700 | 1.44709800  | -0.42073600 |
| C | -3.58908900 | 1.11260100  | -0.49662900 |
| C | -3.14779800 | -0.20929300 | -0.21596000 |
| C | -4.12239900 | -1.19489000 | 0.17146000  |
| C | -5.47034700 | -0.83635500 | 0.24228200  |
| C | -5.87635200 | 0.46455700  | -0.04940100 |
| H | -1.07701100 | 0.20982000  | -0.53396800 |
| H | -5.22524500 | 2.45908500  | -0.63979800 |
| H | -2.85720800 | 1.86403200  | -0.77061200 |
| C | -1.79560100 | -0.56352700 | -0.29164200 |
| C | -3.66658900 | -2.51554400 | 0.47462100  |
| H | -6.22441000 | -1.55860900 | 0.52948000  |
| C | -2.34485000 | -2.83986800 | 0.41390600  |
| C | -1.37369100 | -1.85976000 | 0.02186600  |
| H | -4.39636600 | -3.26907900 | 0.74643000  |
| H | -2.03905500 | -3.86075500 | 0.61123000  |
| O | -7.18782500 | 0.70628100  | 0.04904600  |
| C | -7.70823600 | 2.01507200  | -0.22724000 |
| H | -7.50546100 | 2.30612900  | -1.26100800 |
| H | -8.78133000 | 1.93278900  | -0.07605900 |
| H | -7.29669400 | 2.75384600  | 0.46511700  |
| H | 0.53562600  | -1.27151600 | -1.74564200 |
| N | 1.32293600  | 2.55129800  | 0.59023400  |
| O | 2.59458200  | 2.42162400  | 0.73228900  |
| O | 0.75224200  | 1.46561900  | 0.14258000  |
| O | 0.71930200  | 3.54292000  | 0.83503000  |
| O | 2.59414500  | -0.47654700 | 1.57778300  |
| O | 2.96722600  | 0.70913400  | -1.70602400 |

Figure 4 (c):  $[\text{UO}_2(\text{NAO})(\text{NAO} - \text{H})]^+$

|   |             |             |             |
|---|-------------|-------------|-------------|
| U | -6.27615000 | -3.28568800 | -4.57850800 |
| O | -7.52426700 | -4.53088400 | -4.72071300 |
| O | -4.94107800 | -2.19273000 | -4.12722000 |
| O | -4.63168200 | -4.76274700 | -5.06514600 |
| N | -3.30678500 | -4.46338400 | -5.08490900 |
| C | -2.42845200 | -5.37090500 | -5.46538300 |
| N | -2.87147100 | -6.59764600 | -5.74450700 |
| H | -3.86284000 | -6.78076600 | -5.67139500 |
| H | -2.27288300 | -7.25672500 | -6.21332100 |
| C | 2.51619100  | -1.87104300 | -6.68542200 |



|   |             |             |             |   |              |             |             |
|---|-------------|-------------|-------------|---|--------------|-------------|-------------|
| N | -2.46237100 | 1.01678700  | -2.45218700 | C | -7.73498100  | -0.35062300 | 0.18440500  |
| H | -2.44655700 | 0.15832700  | -1.91454300 | C | -8.53805900  | -1.37919700 | 0.77973700  |
| H | -2.18169100 | 1.86415800  | -1.98541300 | C | -9.81794400  | -1.06176600 | 1.26703300  |
| C | -5.75317600 | 5.68625500  | -6.83093100 | C | -10.31176700 | 0.22926100  | 1.17601600  |
| C | -5.69682500 | 4.48749700  | -6.16440100 | H | -5.87137700  | 0.10646400  | -0.79141200 |
| C | -4.48854500 | 4.02168900  | -5.58985300 | H | -9.89994200  | 2.25980700  | 0.50582500  |
| C | -3.31532000 | 4.83889400  | -5.70943700 | H | -7.67276600  | 1.74392000  | -0.35117900 |
| C | -3.39249700 | 6.06243200  | -6.39645600 | C | -6.45102100  | -0.67245800 | -0.30706400 |
| C | -4.58746800 | 6.48995000  | -6.95292500 | C | -8.00379100  | -2.69730700 | 0.85316400  |
| H | -5.31237200 | 2.20718200  | -4.77073600 | H | -10.43990100 | -1.82385400 | 1.72063800  |
| H | -6.69018300 | 6.01382700  | -7.25963100 | C | -6.75720400  | -2.98562300 | 0.36902800  |
| H | -6.59228800 | 3.88235700  | -6.07354800 | C | -5.95785800  | -1.96240500 | -0.21907600 |
| C | -4.40880500 | 2.79488500  | -4.89541600 | H | -8.60027200  | -3.47794600 | 1.31139500  |
| C | -2.10543100 | 4.37869000  | -5.11498300 | H | -6.35916100  | -3.98924100 | 0.46284500  |
| H | -2.51845100 | 6.69404800  | -6.49834800 | O | -11.55138500 | 0.43246600  | 1.67302800  |
| C | -2.05277200 | 3.18995800  | -4.44010500 | C | -12.13291400 | 1.73504000  | 1.61227700  |
| C | -3.21762700 | 2.37581200  | -4.32865200 | H | -12.24639400 | 2.07289200  | 0.57767700  |
| H | -1.21265900 | 4.98603000  | -5.21010000 | H | -13.11559300 | 1.63506900  | 2.06767200  |
| H | -1.11564500 | 2.84761400  | -4.01701600 | H | -11.54342700 | 2.46144300  | 2.18003300  |
| O | -4.55875500 | 7.67899700  | -7.58985100 | O | 0.61551500   | -0.61826100 | 0.81106000  |
| C | -5.75094000 | 8.19472300  | -8.18442000 | N | 1.68180400   | -1.44398100 | 0.71745200  |
| H | -6.53125700 | 8.35697500  | -7.43482500 | C | 2.45875700   | -1.65334900 | 1.75532000  |
| H | -5.46674200 | 9.14964000  | -8.62043300 | N | 2.11423100   | -1.08714800 | 2.91988800  |
| H | -6.12059500 | 7.53251300  | -8.97314200 | H | 1.30356300   | -0.48250300 | 2.91771600  |
| H | -4.10024800 | 0.06591600  | -5.03694600 | H | 2.78782900   | -1.01633200 | 3.66331000  |
| N | -3.93100800 | -1.36144700 | 0.64487700  | C | 7.42025300   | -4.18211600 | -0.93817500 |
| O | -4.96044400 | -2.12150100 | 0.51260700  | C | 6.31981200   | -3.36789700 | -0.83407000 |
| O | -3.41158200 | -0.99998800 | -0.48712200 | C | 5.53220600   | -3.34280700 | 0.34333100  |
| O | -3.49289300 | -1.01829400 | 1.69877500  | C | 5.91467500   | -4.18561500 | 1.43900300  |
| O | -3.99495700 | -3.64383200 | -1.95567100 | C | 7.04581900   | -5.01118100 | 1.31419700  |
| O | -6.12792800 | -0.81946800 | -1.98501500 | C | 7.79344900   | -5.01872300 | 0.14805500  |

Figure 4 (e):  $[\text{UO}_2(\text{NAO})_2(\text{NAO} - \text{H})]^+$

|   |             |             |             |   |            |             |             |
|---|-------------|-------------|-------------|---|------------|-------------|-------------|
| U | -0.70133400 | -0.15747600 | -1.05282700 | H | 4.14126900 | -1.85580900 | -0.35241800 |
| N | -3.63149400 | -1.44388400 | -0.59965400 | H | 7.99840000 | -4.18194100 | -1.85193700 |
| C | -4.62546600 | -2.29107400 | -0.73747000 | H | 6.04090800 | -2.73434400 | -1.66906500 |
| N | -4.37295600 | -3.46257300 | -1.33652100 | C | 4.39588200 | -2.51464500 | 0.47128300  |
| H | -3.44074100 | -3.60457900 | -1.70158000 | C | 5.12464000 | -4.15458600 | 2.62337400  |
| H | -5.13378100 | -4.02681700 | -1.67490100 | H | 7.35033600 | -5.65625800 | 2.12938500  |
| C | -9.52137000 | 1.24989200  | 0.58249600  | C | 4.02593300 | -3.34532600 | 2.72275300  |
| C | -8.26923900 | 0.95884600  | 0.10062200  | C | 3.64372600 | -2.50994400 | 1.63290000  |
|   |             |             |             | H | 5.39993700 | -4.79711000 | 3.45194600  |
|   |             |             |             | H | 3.42055200 | -3.36506800 | 3.62139200  |

|   |             |             |             |   |             |             |             |
|---|-------------|-------------|-------------|---|-------------|-------------|-------------|
| O | 8.86012500  | -5.84716900 | 0.12584100  | C | -3.44446700 | 0.05931500  | 1.88391200  |
| C | 9.67780600  | -5.91623500 | -1.04270200 | N | -2.96896400 | -0.26171600 | 3.08578000  |
| H | 10.14239100 | -4.94996100 | -1.26166500 | H | -1.98729300 | -0.13655400 | 3.32088000  |
| H | 10.45274300 | -6.64350600 | -0.81135400 | H | -3.59366300 | -0.64270000 | 3.77577300  |
| H | 9.10564200  | -6.26062100 | -1.90954800 | C | -9.08335400 | 0.78734900  | -0.56650200 |
| H | 1.80429700  | -1.92712400 | -0.16974600 | C | -7.80289200 | 1.14314000  | -0.22016900 |
| O | -0.85274100 | 1.21379100  | -2.80854600 | C | -6.94332700 | 0.23879300  | 0.44988600  |
| N | 0.18126900  | 1.79162500  | -2.08688800 | C | -7.44308800 | -1.06590700 | 0.77183300  |
| C | 0.47999500  | 3.02051300  | -2.39614800 | C | -8.75706100 | -1.41219300 | 0.40845000  |
| N | -0.23227000 | 3.69659500  | -3.33306200 | C | -9.57278500 | -0.50808800 | -0.25077100 |
| H | -0.91737000 | 3.15324600  | -3.83909600 | H | -5.27199800 | 1.59018600  | 0.61209800  |
| H | 0.19801000  | 4.47459400  | -3.80508800 | H | -9.71460700 | 1.50079500  | -1.07799500 |
| C | 6.03200400  | 3.62860200  | 0.28731700  | H | -7.43881200 | 2.13578900  | -0.46232500 |
| C | 4.99827800  | 2.98066900  | -0.34548000 | C | -5.62421200 | 0.58528900  | 0.82119000  |
| C | 3.80319200  | 3.65655400  | -0.69220400 | C | -6.58339500 | -1.96912600 | 1.45957200  |
| C | 3.69517000  | 5.04952600  | -0.37300000 | H | -9.15337800 | -2.39269000 | 0.64307300  |
| C | 4.76368400  | 5.69605100  | 0.27842000  | C | -5.31119500 | -1.60867200 | 1.81169500  |
| C | 5.91691200  | 5.00685700  | 0.60699400  | C | -4.81253100 | -0.31399800 | 1.48749800  |
| H | 2.82444200  | 1.96294000  | -1.61539100 | H | -6.95073500 | -2.96090800 | 1.69767100  |
| H | 6.93216900  | 3.08264300  | 0.53454700  | H | -4.66463500 | -2.32040700 | 2.31167100  |
| H | 5.09681600  | 1.92862200  | -0.59186300 | O | 10.81884600 | -0.93586400 | -0.55518200 |
| C | 2.73162000  | 3.01028200  | -1.35198600 | C | 11.72245300 | -0.05772000 | -1.22519500 |
| C | 2.50191300  | 5.73388100  | -0.73761000 | H | 11.34198500 | 0.23088200  | -2.20998400 |
| H | 4.69967800  | 6.74866200  | 0.52705000  | H | 12.64183700 | -0.62593100 | -1.34788900 |
| C | 1.48286400  | 5.08523600  | -1.38227200 | H | 11.92709500 | 0.83619500  | -0.62790800 |
| C | 1.58629600  | 3.69942500  | -1.69619400 | O | 0.61085200  | 1.71908600  | -1.01432200 |
| H | 2.40622600  | 6.78549800  | -0.49113000 | N | 1.04572000  | 2.99593800  | -0.95644000 |
| H | 0.57353100  | 5.61918800  | -1.63216700 | C | 1.01969500  | 3.76677900  | -2.01719700 |
| O | 6.88853000  | 5.72013000  | 1.23067900  | N | 0.46292800  | 3.27559700  | -3.13686000 |
| C | 8.11837600  | 5.08455200  | 1.56485200  | H | 0.15874300  | 2.31202700  | -3.10980400 |
| H | 8.63290900  | 4.71241500  | 0.67287000  | H | 0.65236700  | 3.71378400  | -4.02207000 |
| H | 8.72710200  | 5.85468100  | 2.03420100  | C | 4.84688100  | 8.32254800  | -0.33069800 |
| H | 7.96726800  | 4.26374300  | 2.27396300  | C | 4.35613800  | 7.04134800  | -0.38032500 |
| H | -3.70940800 | -0.58920400 | -0.05310400 | C | 3.20357900  | 6.72418900  | -1.14063100 |
| O | -2.41669900 | -1.71855500 | -1.12938000 | C | 2.55727500  | 7.77505700  | -1.87205200 |
| O | -1.87893800 | 0.77562100  | -0.07549100 | C | 3.07573600  | 9.08045600  | -1.81011100 |
| O | 0.45072400  | -1.28146600 | -1.84443200 | C | 4.20132300  | 9.36157500  | -1.05329900 |
|   |             |             |             | H | 3.20506900  | 4.62236500  | -0.67787500 |
|   |             |             |             | H | 5.72597800  | 8.53331600  | 0.26246300  |
|   |             |             |             | H | 4.85418800  | 6.25442400  | 0.17549200  |
|   |             |             |             | C | 2.68248400  | 5.41356600  | -1.20538600 |

Figure 4 (f):  $[\text{UO}_2(\text{NAO})_3(\text{NO}_3)]^+$





|   |             |             |             |
|---|-------------|-------------|-------------|
| O | 0.16810000  | -2.06338800 | 0.04845100  |
| U | -0.85562500 | -0.00015700 | -0.06539200 |
| O | -1.15616500 | -0.00034300 | 1.67234700  |
| O | -0.74505800 | 0.00044100  | -1.82681300 |
| O | -3.30819000 | 0.00041700  | -0.38661200 |
| H | -3.64750300 | 0.00095400  | -1.29055700 |
| C | -4.41870200 | 0.00027700  | 0.56198500  |
| H | -5.01953900 | -0.89772000 | 0.41844000  |
| H | -3.97506600 | 0.00045500  | 1.55404800  |
| H | -5.01988100 | 0.89802100  | 0.41829800  |
| H | 1.83764300  | 3.17572800  | 0.07733700  |
| H | 1.83777600  | -3.17560900 | 0.07631500  |
| H | 4.06873900  | 1.36139800  | 1.28998400  |
| H | 4.14630900  | 2.16651200  | -0.27413000 |
| H | 5.49490200  | 0.00022500  | -0.18123000 |
| H | 4.28207900  | -0.00024100 | -1.45347400 |
| H | 4.06859000  | -1.36035100 | 1.29079100  |
| H | 4.14667500  | -2.16636000 | -0.27294400 |

Figure 5 (c):  $[\text{UO}_2(\text{GIO} - \text{H})(\text{MeOH})_2]^+$

|   |             |             |             |
|---|-------------|-------------|-------------|
| C | 3.96564300  | -1.29399400 | 0.04339400  |
| C | 4.58647400  | 0.04301300  | 0.48536300  |
| C | 3.97657500  | 1.20757000  | -0.31463700 |
| N | 1.80998600  | -0.02823800 | -0.09734000 |
| C | 2.46654400  | -1.18921200 | 0.07256900  |
| C | 2.47636500  | 1.12776700  | -0.26091900 |
| N | 1.68635400  | -2.22362800 | 0.26325800  |
| N | 1.70599000  | 2.18088300  | -0.37319700 |
| O | 0.35110900  | -2.09754500 | 0.25105600  |
| O | 0.36911000  | 2.06904300  | -0.36045100 |
| U | -0.71532300 | -0.00491400 | -0.00629000 |
| O | -0.89446200 | -0.25816100 | -1.74967400 |
| O | -0.71812400 | 0.25213100  | 1.74588300  |
| O | -2.58380400 | -1.61504100 | 0.35351700  |
| H | -2.75527800 | -1.86191200 | 1.27001700  |
| C | -3.05520700 | -2.66494700 | -0.53436200 |
| H | -4.11937500 | -2.83406500 | -0.36679100 |
| H | -2.89078100 | -2.30786200 | -1.54769800 |
| H | -2.48362000 | -3.57821600 | -0.36598700 |
| H | 2.04365100  | -3.16111600 | 0.41050200  |
| H | 2.07323000  | 3.11748200  | -0.50014500 |

|   |             |             |             |
|---|-------------|-------------|-------------|
| H | 4.27748800  | -1.52770400 | -0.98167800 |
| H | 4.30546800  | -2.11530000 | 0.67814400  |
| H | 5.66633500  | 0.01692400  | 0.33617200  |
| H | 4.40987500  | 0.19653800  | 1.55339300  |
| H | 4.29019700  | 1.14263400  | -1.36350600 |
| H | 4.32332000  | 2.17094100  | 0.06568200  |
| C | -2.80338500 | 2.80663400  | 0.67962000  |
| H | -2.62631200 | 2.44290100  | 1.68850300  |
| H | -2.12498100 | 3.63111300  | 0.45829700  |
| H | -3.84364700 | 3.11552000  | 0.57281000  |
| O | -2.53386100 | 1.69169900  | -0.21344900 |
| H | -2.74998200 | 1.94308900  | -1.11932600 |

Figure 5 (d):  $[\text{UO}_2(\text{GIO})(\text{GIO} - \text{H})]^+$

|   |             |             |             |
|---|-------------|-------------|-------------|
| C | -5.32416900 | 0.01649800  | -1.26956300 |
| C | -5.88695900 | 0.68414300  | -0.00030000 |
| C | -5.32250800 | 0.01402700  | 1.26689600  |
| N | -3.17796800 | -0.14239700 | -0.00293000 |
| C | -3.82658000 | -0.06040400 | -1.17530300 |
| C | -3.82509100 | -0.06339300 | 1.17033100  |
| N | -3.03730200 | -0.04509900 | -2.22254200 |
| N | -3.03460700 | -0.05150400 | 2.21678200  |
| O | -1.70453000 | -0.17515200 | 2.08026100  |
| U | -0.66250100 | -0.01110500 | -0.00335100 |
| C | 6.59734900  | -0.44185000 | 0.21399500  |
| C | 6.02658200  | -1.69916400 | -0.45622600 |
| C | 4.64515500  | -2.02489600 | 0.13471500  |
| N | 4.26730600  | 0.41560700  | 0.10542700  |
| C | 5.64203900  | 0.70966300  | 0.08812900  |
| C | 3.75101000  | -0.81969300 | 0.08736700  |
| N | 6.06620200  | 1.90860900  | -0.02185500 |
| N | 2.44923400  | -0.95099400 | 0.03196900  |
| O | 5.00444100  | 2.81935200  | -0.09460700 |
| O | 1.64401000  | 0.13313400  | 0.02234100  |
| H | 5.44668600  | 3.67105100  | -0.17324600 |
| O | -1.70705600 | -0.16766300 | -2.08811200 |
| O | -0.32604600 | -1.76054400 | -0.00711900 |
| O | -0.85162900 | 1.74601300  | -0.00072600 |
| H | -3.38307100 | 0.00835200  | -3.17420500 |
| H | -3.37907600 | -0.00062100 | 3.16902600  |
| H | -5.62353100 | 0.55732000  | 2.16529100  |

|   |             |             |             |
|---|-------------|-------------|-------------|
| H | -5.71740400 | -1.00500700 | 1.35778900  |
| H | -6.97537000 | 0.61679500  | 0.00037600  |
| H | -5.62748100 | 1.74625000  | 0.00056700  |
| H | -5.62680400 | 0.56126400  | -2.16651300 |
| H | -5.71880500 | -1.00253200 | -1.36160100 |
| H | 3.61940500  | 1.19803000  | 0.05183000  |
| H | 1.98956500  | -1.85983000 | 0.01693900  |
| H | 4.16622200  | -2.85532700 | -0.38882400 |
| H | 4.75246300  | -2.32383100 | 1.18417500  |
| H | 5.94295600  | -1.54690700 | -1.53612900 |
| H | 6.69512900  | -2.54665800 | -0.30054800 |
| H | 6.77270900  | -0.64190300 | 1.27801700  |
| H | 7.55191700  | -0.14510300 | -0.21914800 |

Figure 6 (a):  $[\text{UO}_2(\text{GDO} - \text{H})]^+$

|   |             |             |             |
|---|-------------|-------------|-------------|
| O | -1.42068600 | 1.66643500  | 0.46492300  |
| N | -0.12349600 | 1.55760200  | 0.00246600  |
| C | 0.61364200  | 2.62541600  | -0.02970400 |
| N | 0.13643800  | 3.81426400  | 0.37004500  |
| H | 0.67975000  | 4.65627600  | 0.28405000  |
| H | -0.83184400 | 3.87568700  | 0.65017200  |
| C | 2.04105900  | 2.52690400  | -0.51560500 |
| C | 2.54189200  | 1.10733800  | -0.81805600 |
| H | 2.68452400  | 3.01260000  | 0.22743200  |
| H | 2.12379600  | 3.12788800  | -1.42753500 |
| C | 2.68760200  | 0.23680700  | 0.45443900  |
| H | 1.86501800  | 0.62547200  | -1.52329200 |
| H | 3.51425700  | 1.18653400  | -1.30994500 |
| H | 3.53227100  | 0.58442100  | 1.05397700  |
| H | 1.79578500  | 0.32630800  | 1.07648900  |
| N | 4.06578600  | -1.79413600 | 0.42382100  |
| H | 4.78431000  | -1.26711400 | 0.89212000  |
| H | 4.24809000  | -2.77402000 | 0.26285600  |
| C | 2.88203500  | -1.22127700 | 0.16321700  |
| N | 1.90495400  | -1.94107200 | -0.34015300 |
| O | 0.72266400  | -1.45499900 | -0.76221000 |
| H | 2.04542100  | -2.92042200 | -0.57193200 |
| U | -1.16885900 | -0.49184400 | 0.03590100  |
| O | -0.63918800 | -0.86256200 | 1.68385400  |
| O | -1.83647300 | -0.38534300 | -1.59109800 |

Figure 6 (b):  $[\text{UO}_2(\text{GDO})(\text{GDO} - \text{H})]^+$

|   |             |             |             |
|---|-------------|-------------|-------------|
| O | -1.08009300 | 2.06937100  | 0.89253100  |
| N | -2.16711500 | 1.23927300  | 0.79280700  |
| C | -3.32325900 | 1.72825400  | 1.08899300  |
| N | -3.46995900 | 3.03885000  | 1.44004100  |
| H | -4.28899300 | 3.31311400  | 1.95781400  |
| H | -2.60604500 | 3.51693200  | 1.65882600  |
| C | -4.55943900 | 0.86830800  | 0.97925700  |
| C | -4.32691800 | -0.53115900 | 0.39502700  |
| H | -5.30092000 | 1.41612600  | 0.38403500  |
| H | -4.99619300 | 0.76171000  | 1.97940200  |
| C | -3.89155600 | -0.48459800 | -1.08780000 |
| H | -3.56261000 | -1.04432200 | 0.97731100  |
| H | -5.25276300 | -1.10624900 | 0.48189500  |
| H | -4.73351400 | -0.19086700 | -1.72040800 |
| H | -3.10832800 | 0.26670100  | -1.20967200 |
| N | -3.98686200 | -2.43745200 | -2.58344000 |
| H | -4.72547800 | -1.96681400 | -3.07800400 |
| H | -3.59249000 | -3.25072900 | -3.03097300 |
| C | -3.33249100 | -1.77390600 | -1.60166200 |
| N | -2.22342900 | -2.26302800 | -1.10844900 |
| O | -1.54909900 | -1.77403600 | -0.06152200 |
| H | -1.85088000 | -3.13339800 | -1.48140900 |
| U | -0.11308300 | 0.11890500  | 0.22053800  |
| O | 1.83108900  | 1.51398400  | 0.05447800  |
| N | 2.24534200  | 1.83271700  | -1.18002600 |
| C | 3.48468600  | 1.72769700  | -1.56670800 |
| N | 3.83676500  | 1.99340200  | -2.84710300 |
| C | 4.53198700  | 1.24749200  | -0.60242000 |
| H | 4.81016700  | 2.11163700  | -3.07128300 |
| H | 3.17404200  | 2.37560600  | -3.50457700 |
| C | 4.42878700  | -0.27926500 | -0.30814300 |
| H | 4.42473600  | 1.82164900  | 0.32080200  |
| H | 5.51234000  | 1.48292600  | -1.02103600 |
| C | 3.84469300  | -0.57184100 | 1.09398000  |
| H | 3.80011200  | -0.75252700 | -1.06230100 |
| H | 5.42321400  | -0.72372300 | -0.38751500 |
| H | 4.61195500  | -0.43717300 | 1.86034200  |
| H | 3.04240700  | 0.14025500  | 1.29208300  |
| C | 3.26053400  | -1.94476200 | 1.22737100  |
| N | 3.84069200  | -2.84387400 | 2.05657900  |

|   |             |             |             |
|---|-------------|-------------|-------------|
| N | 2.20636700  | -2.27053100 | 0.52757900  |
| H | 3.38193800  | -3.71301500 | 2.28624700  |
| H | 4.51020200  | -2.51000200 | 2.72977300  |
| O | 1.61033100  | -1.47068900 | -0.36871300 |
| H | 1.78323200  | -3.18930800 | 0.63846500  |
| H | 1.50015700  | 2.07236900  | -1.83534900 |
| O | -0.33207500 | 0.51582900  | -1.52384900 |
| O | 0.24142100  | -0.37233200 | 1.90117200  |
